# Supplementary material for: The underlying microbial mechanism of epizootic rabbit enteropathy triggered by a low fiber diet
Source: PubMed Central journal article supplement (PMC6104036; doi:10.1038/s41598-018-30178-2), 2018-08-21
Supplement: 41598_2018_30178_MOESM1_ESM.pdf [file 41598_2018_30178_MOESM1_ESM.pdf]

# The underlying microbial mechanism of epizootic rabbit enteropathy triggered by a low fiber diet

DingXing Jin<sup>a\*</sup>, HuaWei Zou<sup>a\*</sup>, SiQiang Liu<sup>a</sup>, LiZhi Wang<sup>a</sup>, Bai Xue<sup>a</sup>, De Wu<sup>a</sup>, Gang Tian<sup>a</sup>, Jingyi Cai<sup>a</sup>, TianHai Yan<sup>b</sup>, ZhiSheng Wang<sup>a</sup> & QuanHui Peng<sup>a</sup>

<sup>a</sup> Institute of Animal Nutrition, Key Laboratory of Bovine Low-Carbon Farming and Safe Production, Sichuan Agricultural University, Ya'an, Sichuan, 625014, PR China

<sup>b</sup> Agri-Food and Biosciences Institute, Hillsborough, Co. Down BT26 6DR, United Kingdom

\*This two authors contributed equally to this paper.

Correspondence and requests for materials should be addressed to Q.P. and Z.W. (email: [pengquanhui@126.com](mailto:pengquanhui@126.com) , [wangzs67@163.com](mailto:wangzs67@163.com) )

Address: Animal nutrition institute, Xinkang road 46#, Yucheng, Ya'an, Sichuan province. Post code: 625014

Tel: +86 15283511570

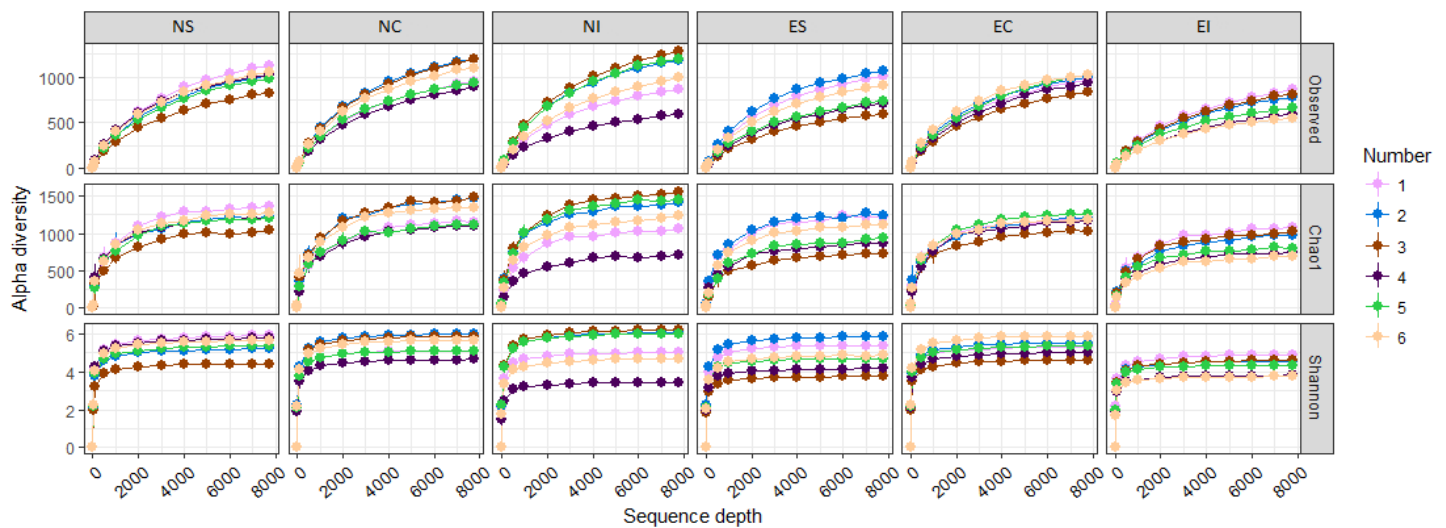

**Figure S1. Diversity estimation of the 16S rRNA gene libraries in the stomach, small intestine and caecum of normal and ERE rabbits from the sequencing data.**
