# Supplementary material for: The underlying microbial mechanism of epizootic rabbit enteropathy triggered by a low fiber diet
Source: PubMed Central journal article supplement (PMC6104036; doi:10.1038/s41598-018-30178-2), 2018-08-21
Supplement: 41598_2018_30178_MOESM2_ESM.pdf [file 41598_2018_30178_MOESM2_ESM.pdf]

## The underlying microbial mechanism of epizootic rabbit enteropathy triggered by a low fiber diet

DingXing Jin<sup>a\*</sup>, HuaWei Zou<sup>a\*</sup>, SiQiang Liu<sup>a</sup>, LiZhi Wang<sup>a</sup>, Bai Xue<sup>a</sup>, De Wu<sup>a</sup>, Gang Tian<sup>a</sup>, Jingyi Cai<sup>a</sup>, TianHai Yan<sup>b</sup>, ZhiSheng Wang<sup>a</sup> & QuanHui Peng<sup>a</sup>

<sup>a</sup> Institute of Animal Nutrition, Key Laboratory of Bovine Low-Carbon Farming and Safe Production, Sichuan Agricultural University, Ya'an, Sichuan, 625014, PR China

<sup>b</sup> Agri-Food and Biosciences Institute, Hillsborough, Co. Down BT26 6DR, United Kingdom

\*This two authors contributed equally to this paper.

Correspondence and requests for materials should be addressed to Q.P. and Z.W. (email: [pengquanhui@126.com](mailto:pengquanhui@126.com), [wangzs67@163.com](mailto:wangzs67@163.com))

Address: Animal nutrition institute, Xinkang road 46#, Yucheng, Ya'an, Sichuan province. Post code: 625014

Tel: +86 15283511570

**Table S1. Relative abundance (%) of bacterial at different classification level in the three parts of the digestive tracts in normal and ERE rabbits.** The relative abundance  $\geq 0.05\%$  was present in this table.

| Item                                 | S                  |       |       | I                  |       |       | C                  |       |       | P-value |
|--------------------------------------|--------------------|-------|-------|--------------------|-------|-------|--------------------|-------|-------|---------|
|                                      | NS                 | ES    | P     | NI                 | EI    | P     | NC                 | EC    | P     | Normal  |
| p__Firmicutes                        | 44.60 <sup>b</sup> | 25.73 | <0.01 | 41.69 <sup>b</sup> | 31.71 | <0.01 | 72.12 <sup>a</sup> | 47.72 | <0.01 | <0.01   |
| c__Clostridia                        | 33.00 <sup>c</sup> | 17.43 | <0.01 | 37.61 <sup>b</sup> | 22.98 | <0.01 | 65.70 <sup>a</sup> | 39.78 | <0.01 | <0.01   |
| o__Clostridiales                     | 32.80 <sup>c</sup> | 17.42 | <0.01 | 37.57 <sup>b</sup> | 23.01 | <0.01 | 65.66 <sup>a</sup> | 39.72 | <0.01 | <0.01   |
| f__Ruminococcaceae                   | 16.84 <sup>c</sup> | 6.69  | <0.01 | 24.72 <sup>b</sup> | 9.24  | <0.01 | 32.77 <sup>a</sup> | 13.70 | <0.01 | <0.01   |
| g__Ruminococcaceae<br>NK4A214 group  | 3.10 <sup>b</sup>  | 2.15  | 0.13  | 3.14 <sup>b</sup>  | 0.53  | <0.01 | 7.27 <sup>a</sup>  | 4.55  | <0.01 | <0.01   |
| g__Ruminococcaceae<br>V9D2013 group  | 1.52 <sup>b</sup>  | 1.09  | 0.35  | 4.61 <sup>a</sup>  | 0.37  | <0.01 | 5.20 <sup>a</sup>  | 1.90  | <0.01 | <0.01   |
| g__Ruminococcaceae UCG-<br>014 group | 0.05 <sup>b</sup>  | 0.16  | 0.05  | 2.54 <sup>a</sup>  | 0.52  | <0.01 | 2.37 <sup>a</sup>  | 2.13  | 0.64  | <0.01   |
| g__Ruminococcaceae UCG-<br>013 group | 0.15 <sup>b</sup>  | 0.23  | 0.52  | 0.24 <sup>b</sup>  | 0.15  | 0.43  | 1.01 <sup>a</sup>  | 0.83  | 0.43  | 0.03    |
| g__Ruminococcaceae UCG-<br>005 group | 0                  | 0     | -     | 0.24               | 0.05  | 0.04  | 0.22               | 0.11  | 0.46  | 0.11    |
| g__Ruminococcus                      | 1.85 <sup>b</sup>  | 0.09  | 0.03  | 2.03 <sup>b</sup>  | 0.56  | <0.01 | 3.77 <sup>a</sup>  | 0.89  | <0.01 | <0.01   |
| g__Subdoligranulum                   | 1.05 <sup>b</sup>  | 0.65  | 0.24  | 1.13 <sup>b</sup>  | 0.98  | 0.10  | 2.41 <sup>a</sup>  | 1.85  | 0.23  | <0.01   |
| g__Ruminiclostridium                 | 3.74 <sup>a</sup>  | 1.43  | <0.01 | 4.73 <sup>a</sup>  | 0.84  | <0.01 | 1.44 <sup>b</sup>  | 1.29  | 0.46  | 0.02    |
| g__Anaerotruncus                     | 0.22 <sup>c</sup>  | 0.14  | 0.14  | 0.39 <sup>b</sup>  | 0.29  | 0.58  | 0.63 <sup>a</sup>  | 0.31  | <0.01 | <0.01   |
| g__Faecalibacterium                  | 0.76               | 0.07  | 0.06  | 0.32               | 0     | 0.02  | 1.59               | 0.14  | <0.01 | 0.08    |
| g__Flavonifractor                    | 0.54 <sup>a</sup>  | 0     | 0.02  | 0.09 <sup>b</sup>  | 0.12  | 0.55  | 0.69 <sup>a</sup>  | 0.12  | <0.01 | <0.01   |
| g__Papillibacter                     | 0.60               | 0     | 0.02  | 0                  | 0     | -     | 0.91               | 0.13  | <0.01 | <0.01   |
| f__Lachnospiraceae                   | 5.91 <sup>b</sup>  | 3.74  | 0.01  | 8.66 <sup>b</sup>  | 5.78  | 0.07  | 23.66 <sup>a</sup> | 11.16 | <0.01 | <0.01   |

|                                     |                   |      |       |                   |      |       |                   |      |       |       |
|-------------------------------------|-------------------|------|-------|-------------------|------|-------|-------------------|------|-------|-------|
| g__Lachnospiraceae<br>NK4A136 group | 2.30 <sup>c</sup> | 1.55 | 0.10  | 5.40 <sup>b</sup> | 2.54 | 0.02  | 8.46 <sup>a</sup> | 3.26 | <0.01 | <0.01 |
| g__Lachnoclostridium                | 0.87 <sup>b</sup> | 0.63 | 0.45  | 1.40 <sup>a</sup> | 0.87 | 0.10  | 1.49 <sup>b</sup> | 1.09 | 0.13  | 0.01  |
| g__Sporobacter                      | 0.16 <sup>b</sup> | 0.21 | 0.57  | 0.22 <sup>b</sup> | 0.52 | 0.16  | 1.69 <sup>a</sup> | 1.48 | 0.51  | <0.01 |
| g__Fusicatenibacter                 | 0.30 <sup>b</sup> | 0.21 | 0.35  | 0.34 <sup>b</sup> | 0.15 | 0.05  | 2.35 <sup>a</sup> | 0.61 | <0.01 | <0.01 |
| g__Butyrivibrio                     | 0.35              | 0    | <0.01 | 0.87              | 0    | <0.01 | 0.66              | 0.05 | <0.01 | 0.57  |
| g__Tyzzerella                       | 0.51 <sup>a</sup> | 0.33 | 0.51  | 0.49 <sup>a</sup> | 0.13 | 0.06  | 0.18 <sup>b</sup> | 0.19 | 0.86  | 0.03  |
| g__Anaerospobacter                  | 0.24 <sup>b</sup> | 0.21 | 0.60  | 0.35 <sup>a</sup> | 1.54 | <0.01 | 0.42 <sup>a</sup> | 0.29 | 0.05  | <0.01 |
| g__Blautia                          | 0.10              | 0.07 | 0.47  | 0.18              | 0.13 | 0.62  | 0.27              | 0.11 | 0.04  | 0.06  |
| f__Eubacteriaceae                   | 4.91 <sup>a</sup> | 0.67 | <0.01 | 1.17 <sup>c</sup> | 0.24 | 0.06  | 4.64 <sup>b</sup> | 3.10 | 0.03  | <0.01 |
| g__Eubacterium                      | 1.34 <sup>a</sup> | 0.45 | 0.04  | 0.76 <sup>c</sup> | 0.19 | 0.30  | 1.40 <sup>b</sup> | 1.10 | 0.49  | <0.01 |
| f__Clostridiaceae                   | 2.06 <sup>b</sup> | 5.17 | <0.01 | 2.46 <sup>b</sup> | 6.84 | <0.01 | 3.92 <sup>a</sup> | 9.78 | <0.01 | 0.03  |
| g__Clostridium                      | 0.89              | 3.83 | <0.01 | 1.10              | 3.12 | <0.01 | 1.27              | 6.52 | <0.01 | 0.09  |
| f__Christensenellaceae              | 0.40              | 0.29 | 0.33  | 0.41              | 0.26 | 0.39  | 0.64              | 1.58 | <0.01 | 0.14  |
| g__Christensenellaceae<br>R-7 group | 0.33              | 0.28 | 0.72  | 0.40              | 0.24 | 0.33  | 0.64              | 1.56 | <0.01 | 0.10  |
| f__Family XI                        | 0.25              | 0.56 | 0.14  | 0.21              | 0.53 | 0.16  | 0.18              | 0.23 | 0.52  | 0.72  |
| g__Sedimentibacter                  | 0.25              | 0.56 | 0.14  | 0.21              | 0.53 | 0.16  | 0.18              | 0.23 | 0.52  | 0.72  |
| o__Halanaerobiales                  | 0                 | 0    | -     | 0                 | 0    | -     | 0                 | 0.11 | 0.43  | -     |
| f__Halobacteroidaceae               | 0                 | 0    | -     | 0                 | 0    | -     | 0                 | 0.11 | 0.43  | -     |
| c__Bacilli                          | 3.87              | 6.45 | 0.02  | 2.26              | 7.03 | <0.01 | 3.06              | 4.06 | 0.03  | 0.17  |
| o__Bacillales                       | 2.40              | 6.13 | <0.01 | 1.75              | 6.93 | <0.01 | 0.95              | 3.95 | <0.01 | 0.06  |
| f__Planococcaceae                   | 0.65              | 5.47 | <0.01 | 0.53              | 5.87 | <0.01 | 0.26              | 3.43 | <0.01 | 0.33  |
| g__Lysinibacillus                   | 0.29              | 3.16 | <0.01 | 0.18              | 1.87 | <0.01 | 0.11              | 2.51 | <0.01 | 0.21  |
| g__Solibacillus                     | 0.32              | 0.25 | 0.62  | 0.30              | 2.22 | <0.01 | 0.13              | 0.90 | <0.01 | 0.45  |
| f__Bacillaceae                      | 1.09              | 0.55 | 0.05  | 0.90              | 0.81 | 0.77  | 0.53              | 0.47 | 0.78  | 0.14  |
| g__Bacillus                         | 1.09              | 0.55 | 0.05  | 0.90              | 0.81 | 0.77  | 0.53              | 0.47 | 0.78  | 0.14  |
| o__Lactobacillales                  | 2.44              | 0.22 | 0.06  | 1.89              | 0.08 | 0.11  | 2.44              | 0.08 | <0.01 | 0.63  |
| f__Lactobacillaceae                 | 2.44              | 0.22 | 0.06  | 1.89              | 0.08 | 0.11  | 2.38              | 0.08 | <0.01 | 0.63  |
| g__Lactobacillus                    | 2.24              | 0.09 | 0.04  | 1.89              | 0.05 | 0.01  | 1.08              | 0.08 | <0.01 | 0.48  |
| c__Erysipelotrichia                 | 5.58 <sup>a</sup> | 0.21 | <0.01 | 0.45 <sup>b</sup> | 0.64 | 0.37  | 0.27 <sup>b</sup> | 0.25 | 0.80  | <0.01 |
| o__Erysipelotrichales               | 4.24 <sup>a</sup> | 0.21 | <0.01 | 1.66 <sup>b</sup> | 0.51 | 0.41  | 0.27 <sup>b</sup> | 0.25 | 0.80  | <0.01 |
| f__Erysipelotrichaceae              | 4.24 <sup>a</sup> | 0.21 | <0.01 | 1.66 <sup>b</sup> | 0.51 | 0.41  | 0.27 <sup>b</sup> | 0.25 | 0.80  | <0.01 |
| g__Allobaculum                      | 2.29 <sup>a</sup> | 0.11 | <0.01 | 0.35 <sup>b</sup> | 0.15 | 0.25  | 0.11 <sup>b</sup> | 0.11 | 0.83  | <0.01 |
| g__Turicibacter                     | 0.68              | 0.06 | 0.08  | 0.43              | 0.29 | 0.70  | 0.11              | 0.12 | 0.83  | 0.51  |
| c__Negativicutes                    | 2.14              | 1.50 | 0.22  | 1.28              | 1.54 | 0.64  | 2.95              | 3.59 | 0.58  | 0.16  |
| o__Selenomonadales                  | 2.14              | 1.46 | 0.19  | 1.28              | 1.37 | 0.44  | 2.78              | 3.27 | 0.69  | 0.25  |
| f__Acidaminococcaceae               | 1.76              | 1.63 | 0.87  | 0.92              | 1.13 | 0.49  | 1.78              | 2.88 | 0.72  | 0.19  |
| g__Phascolarctobacterium            | 1.76              | 0.95 | 0.07  | 0.91              | 1.13 | 0.50  | 0.27              | 1.37 | 0.03  | 0.19  |
| f__Veillonellaceae                  | 0.38              | 0.49 | 0.48  | 0.36              | 0.25 | 0.40  | 0.34              | 0.36 | 0.76  | 0.96  |
| g__Megasphaera                      | 0.19              | 0.38 | 0.13  | 0.25              | 0.21 | 0.65  | 0.25              | 0.27 | 0.83  | 0.77  |

|                         |                    |       |       |                    |       |       |                   |       |       |       |
|-------------------------|--------------------|-------|-------|--------------------|-------|-------|-------------------|-------|-------|-------|
| p__Proteobacteria       | 27.50 <sup>a</sup> | 52.25 | <0.01 | 18.28 <sup>b</sup> | 16.48 | 0.23  | 5.09 <sup>c</sup> | 10.86 | <0.01 | <0.01 |
| c__Gammaproteobacteria  | 14.03 <sup>a</sup> | 22.47 | <0.01 | 10.44 <sup>b</sup> | 14.64 | 0.01  | 2.79 <sup>c</sup> | 9.25  | <0.01 | <0.01 |
| o__Enterobacteriales    | 3.67 <sup>a</sup>  | 17.64 | <0.01 | 3.50 <sup>a</sup>  | 13.01 | <0.01 | 1.34 <sup>b</sup> | 7.19  | <0.01 | <0.01 |
| f__Enterobacteriaceae   | 3.67 <sup>a</sup>  | 17.64 | <0.01 | 3.50 <sup>a</sup>  | 13.01 | <0.01 | 1.34 <sup>b</sup> | 7.19  | <0.01 | <0.01 |
| g__Escherichia-Shigella | 1.85 <sup>b</sup>  | 1.73  | 0.77  | 2.78 <sup>b</sup>  | 1.18  | <0.01 | 2.62 <sup>a</sup> | 0.63  | <0.01 | 0.03  |
| g__Enterobacter         | 0.34 <sup>a</sup>  | 4.12  | <0.01 | 0.13 <sup>ab</sup> | 5.30  | <0.01 | 0.07 <sup>b</sup> | 0.12  | 0.49  | 0.02  |
| g__Escherichia          | 0.74               | 3.80  | <0.01 | 0.33               | 4.39  | <0.01 | 0.11              | 6.39  | <0.01 | 0.64  |
| o__Pseudomonadales      | 7.08 <sup>a</sup>  | 4.01  | 0.03  | 4.36 <sup>b</sup>  | 1.13  | <0.01 | 0.82 <sup>c</sup> | 1.45  | 0.16  | <0.01 |
| f__Pseudomonadaceae     | 5.05 <sup>a</sup>  | 4.17  | 0.02  | 4.03 <sup>b</sup>  | 1.11  | <0.01 | 0.82 <sup>c</sup> | 1.34  | 0.19  | <0.01 |
| g__Pseudomonas          | 2.71 <sup>a</sup>  | 4.17  | 0.05  | 3.69 <sup>b</sup>  | 1.09  | <0.01 | 0.66 <sup>c</sup> | 1.21  | 0.17  | <0.01 |
| o__Xanthomonadales      | 1.53 <sup>a</sup>  | 0.34  | <0.01 | 1.00 <sup>a</sup>  | 0.16  | 0.02  | 0.22 <sup>b</sup> | 0.19  | 0.71  | <0.01 |
| f__Xanthomonadaceae     | 1.48 <sup>a</sup>  | 0.32  | <0.01 | 0.97 <sup>a</sup>  | 0.15  | 0.02  | 0.18 <sup>b</sup> | 0.18  | 0.94  | <0.01 |
| g__Xanthomonas          | 1.32 <sup>a</sup>  | 0.29  | <0.01 | 0.80 <sup>b</sup>  | 0.15  | 0.02  | 0.18 <sup>c</sup> | 0.18  | 0.95  | <0.01 |
| o__Oceanospirillales    | 1.39 <sup>a</sup>  | 0.12  | <0.01 | 0.19 <sup>b</sup>  | 0     | 0.20  | 0.20 <sup>b</sup> | 0     | 0.33  | <0.01 |
| f__Halomonadaceae       | 1.39 <sup>a</sup>  | 0.11  | <0.01 | 0.19 <sup>b</sup>  | 0     | 0.20  | 0.20 <sup>b</sup> | 0     | 0.34  | <0.01 |
| g__Halomonas            | 1.39 <sup>a</sup>  | 0.11  | <0.01 | 0.19 <sup>b</sup>  | 0     | 0.20  | 0.20 <sup>b</sup> | 0     | 0.34  | <0.01 |
| o__Acidithiobacillales  | 0.33               | 0.32  | 0.93  | 0.36               | 0.24  | 0.36  | 0.14              | 0.23  | 0.27  | 0.27  |
| c__Alphaproteobacteria  | 7.45 <sup>a</sup>  | 24.44 | <0.01 | 4.41 <sup>b</sup>  | 0.88  | <0.01 | 0.14 <sup>c</sup> | 0.10  | 0.18  | <0.01 |
| o__Sphingomonadales     | 3.86 <sup>a</sup>  | 15.55 | <0.01 | 2.86 <sup>a</sup>  | 0.49  | <0.01 | 0.66 <sup>b</sup> | 0.54  | 0.40  | <0.01 |
| f__Sphingomonadaceae    | 3.85 <sup>a</sup>  | 12.81 | <0.01 | 2.86 <sup>a</sup>  | 0.49  | <0.01 | 0.63 <sup>b</sup> | 0.52  | 0.43  | <0.01 |
| g__Sphingomonas         | 3.37 <sup>a</sup>  | 13.93 | <0.01 | 2.12 <sup>a</sup>  | 0.41  | <0.01 | 0.59 <sup>b</sup> | 0.50  | 0.53  | <0.01 |
| o__Rhizobiales          | 2.41 <sup>a</sup>  | 6.56  | <0.01 | 0.96 <sup>b</sup>  | 0.25  | <0.01 | 0.42 <sup>b</sup> | 0.29  | 0.27  | <0.01 |
| f__Methylobacteriaceae  | 1.35 <sup>a</sup>  | 2.32  | 0.13  | 0.50 <sup>ab</sup> | 0.14  | 0.09  | 0.27 <sup>b</sup> | 0.20  | 0.42  | 0.04  |
| g__Methylobacterium     | 1.35 <sup>a</sup>  | 2.32  | 0.28  | 0.50 <sup>ab</sup> | 0.14  | 0.09  | 0.27 <sup>b</sup> | 0.20  | 0.42  | 0.04  |
| f__Hyphomicrobiaceae    | 0.36               | 2.34  | <0.01 | 0.19               | 0     | 0.07  | 0                 | 0     | -     | 0.02  |
| o__Rhodospirillales     | 0.61               | 0.29  | 0.32  | 0.29               | 0.08  | 0.07  | 0.14              | 0.10  | 0.68  | 0.23  |
| f__Rhodospirillaceae    | 0.31               | 0.26  | 0.79  | 0.24               | 0.08  | 0.10  | 0.11              | 0.10  | 0.72  | 0.53  |
| g__Defluviicoccus       | 0.26               | 0.11  | 0.48  | 0.16               | 0.08  | 0.46  | 0.10              | 0.06  | 0.61  | 0.69  |
| o__Caulobacterales      | 0.47               | 0.43  | 0.85  | 0.24               | 0.07  | 0.03  | 0.09              | 0.10  | 0.89  | 0.05  |
| f__Caulobacteraceae     | 0.42 <sup>a</sup>  | 0.42  | 0.95  | 0.21 <sup>ab</sup> | 0.05  | 0.03  | 0.09 <sup>b</sup> | 0.09  | 0.75  | 0.04  |
| g__Brevundimonas        | 0.24               | 0.28  | 0.77  | 0.18               | 0     | 0.04  | 0.08              | 0.09  | 0.68  | 0.31  |
| c__Betaproteobacteria   | 4.79 <sup>a</sup>  | 4.82  | 0.99  | 2.67 <sup>b</sup>  | 0.47  | <0.01 | 0.67 <sup>c</sup> | 0.53  | 0.45  | <0.01 |
| o__Burkholderiales      | 3.85 <sup>a</sup>  | 4.29  | 0.73  | 2.34 <sup>b</sup>  | 0.41  | <0.01 | 0.58 <sup>c</sup> | 0.50  | 0.61  | <0.01 |
| f__Oxalobacteraceae     | 1.93 <sup>a</sup>  | 2.69  | 0.48  | 1.10 <sup>ab</sup> | 0.15  | <0.01 | 0.20 <sup>b</sup> | 0.17  | 0.64  | 0.01  |
| g__Janthinobacterium    | 1.16 <sup>a</sup>  | 2.31  | 0.15  | 0.83 <sup>ab</sup> | 0.10  | <0.01 | 0.11 <sup>b</sup> | 0.11  | 0.98  | <0.01 |
| f__Comamonadaceae       | 0.44               | 0.55  | 0.68  | 0.35               | 0.07  | 0.03  | 0                 | 0.07  | 0.21  | 0.05  |
| g__Comamonas            | 0.44               | 0.55  | 0.68  | 0.35               | 0.07  | 0.03  | 0                 | 0.07  | 0.21  | 0.05  |
| f__Burkholderiaceae     | 0.80 <sup>a</sup>  | 0.60  | 0.37  | 0.36 <sup>b</sup>  | 0.13  | 0.09  | 0.25 <sup>b</sup> | 0.18  | 0.46  | <0.01 |
| g__Burkholderia         | 0.78 <sup>a</sup>  | 0.57  | 0.31  | 0.35 <sup>b</sup>  | 0.12  | 0.08  | 0.24 <sup>b</sup> | 0.18  | 0.49  | <0.01 |
| c__Deltaproteobacteria  | 1.38 <sup>a</sup>  | 0.88  | 0.18  | 0.71 <sup>b</sup>  | 0.48  | 0.35  | 0.22 <sup>b</sup> | 0.16  | 0.51  | <0.01 |

|                                   |                    |       |       |                    |       |       |                    |       |       |       |
|-----------------------------------|--------------------|-------|-------|--------------------|-------|-------|--------------------|-------|-------|-------|
| o__Desulfovibrionales             | 0.80               | 0.77  | 0.94  | 0.45               | 0.42  | 0.84  | 0.15               | 0.13  | 0.80  | 0.06  |
| f__Desulfovibrionaceae            | 0.80               | 0.77  | 0.94  | 0.45               | 0.42  | 0.84  | 0.15               | 0.13  | 0.80  | 0.06  |
| g__Bilophila                      | 0.57               | 0.49  | 0.81  | 0.28               | 0.36  | 0.62  | 0.10               | 0.12  | 0.83  | 0.18  |
| o__Desulfuromonadales             | 0.30               | 0.08  | 0.04  | 0.23               | 0     | 0.27  | 0.05               | 0     | 0.40  | 0.25  |
| f__Desulfuromonadaceae            | 0.20               | 0.08  | 0.10  | 0.22               | 0     | 0.28  | 0                  | 0     | -     | 0.39  |
| g__Desulfuromonas                 | 0.20               | 0.08  | 0.10  | 0.22               | 0     | 0.28  | 0                  | 0     | -     | 0.39  |
|                                   |                    |       |       |                    |       |       |                    |       |       |       |
| p__Bacteroidetes                  | 18.93 <sup>b</sup> | 16.39 | 0.18  | 32.33 <sup>a</sup> | 41.06 | <0.01 | 13.23 <sup>c</sup> | 24.20 | <0.01 | <0.01 |
| c__Bacteroidia                    | 13.34 <sup>b</sup> | 15.93 | 0.25  | 26.64 <sup>a</sup> | 40.89 | <0.01 | 12.92 <sup>b</sup> | 24.00 | <0.01 | <0.01 |
| o__Bacteroidales                  | 13.06 <sup>b</sup> | 15.60 | 0.26  | 24.38 <sup>a</sup> | 40.24 | <0.01 | 12.77 <sup>b</sup> | 23.79 | <0.01 | <0.01 |
| f__Bacteroidaceae                 | 4.08 <sup>b</sup>  | 10.42 | <0.01 | 8.52 <sup>a</sup>  | 20.45 | <0.01 | 2.60 <sup>b</sup>  | 14.88 | <0.01 | <0.01 |
| g__Bacteroides                    | 3.93 <sup>b</sup>  | 8.42  | 0.01  | 4.52 <sup>a</sup>  | 20.45 | <0.01 | 2.60 <sup>b</sup>  | 17.09 | <0.01 | <0.01 |
| f__Rikenellaceae                  | 6.08 <sup>b</sup>  | 2.32  | <0.01 | 12.36 <sup>a</sup> | 10.77 | 0.03  | 7.65 <sup>b</sup>  | 5.20  | 0.03  | <0.01 |
| g__Alistipes                      | 1.82 <sup>b</sup>  | 0.92  | 0.02  | 1.88 <sup>b</sup>  | 0.91  | <0.01 | 3.84 <sup>a</sup>  | 0.75  | <0.01 | <0.01 |
| g__Rikenella                      | 0.57               | 1.38  | 0.55  | 0.81               | 1.10  | 0.50  | 0.36               | 4.11  | 0.01  | 0.41  |
| g__dgA-11 gut group               | 0.22               | 0.08  | 0.10  | 0.51               | 1.23  | <0.01 | 0.29               | 0.35  | 0.80  | 0.04  |
| g__Rikenellaceae RC9<br>gut group | 0.30               | 0     | <0.01 | 0.47               | 0     | <0.01 | 0.07               | 0     | <0.01 | <0.01 |
| f__Prevotellaceae                 | 0.89               | 0.07  | <0.01 | 2.04               | 0.05  | <0.01 | 1.95               | 0     | <0.01 | 0.08  |
| g__Prevotella                     | 0.89               | 0.07  | <0.01 | 1.87               | 0.05  | <0.01 | 1.95               | 0     | <0.01 | 0.10  |
| f__Bacteroidales S24-7 group      | 2.15               | 1.76  | 0.63  | 2.44               | 5.94  | <0.01 | 2.24               | 3.58  | 0.02  | 0.93  |
| c__Sphingobacteria                | 5.07 <sup>a</sup>  | 0.21  | <0.01 | 5.17 <sup>a</sup>  | 0.14  | <0.01 | 0.26 <sup>b</sup>  | 0.14  | 0.49  | <0.01 |
| o__Sphingobacteriales             | 5.01 <sup>a</sup>  | 0.19  | <0.01 | 4.26 <sup>b</sup>  | 0.13  | <0.01 | 0.24 <sup>b</sup>  | 0.14  | 0.51  | <0.01 |
| f__Sphingobacteriaceae            | 4.40 <sup>a</sup>  | 0.18  | <0.01 | 3.89 <sup>b</sup>  | 0.13  | <0.01 | 0.22 <sup>b</sup>  | 0.14  | 0.56  | <0.01 |
| g__Pedobacter                     | 1.15 <sup>a</sup>  | 0.10  | <0.01 | 0.96 <sup>b</sup>  | 0.06  | <0.01 | 0.11 <sup>b</sup>  | 0.07  | 0.48  | <0.01 |
| g__Mucilaginibacter               | 0.37               | 0.08  | 0.18  | 0.30               | 0.06  | 0.15  | 0.10               | 0.07  | 0.69  | 0.43  |
|                                   |                    |       |       |                    |       |       |                    |       |       |       |
| p__Verrucomicrobia                | 0.52 <sup>b</sup>  | 3.22  | 0.19  | 0.74 <sup>b</sup>  | 9.42  | <0.01 | 4.29 <sup>a</sup>  | 13.27 | <0.01 | <0.01 |
| c__Verrucomicrobiae               | 0.44 <sup>b</sup>  | 3.13  | 0.23  | 0.73 <sup>b</sup>  | 9.35  | <0.01 | 4.19 <sup>a</sup>  | 13.24 | <0.01 | <0.01 |
| o__Verrucomicrobiales             | 0.44 <sup>b</sup>  | 3.13  | 0.23  | 0.73 <sup>b</sup>  | 9.21  | <0.01 | 4.19 <sup>a</sup>  | 13.09 | <0.01 | <0.01 |
| f__Verrucomicrobiaceae            | 0.44 <sup>b</sup>  | 3.13  | 0.23  | 0.73 <sup>b</sup>  | 9.21  | <0.01 | 4.19 <sup>a</sup>  | 13.07 | <0.01 | <0.01 |
| g__Akkermansia                    | 0.42 <sup>b</sup>  | 3.08  | 0.04  | 0.73 <sup>b</sup>  | 9.21  | <0.01 | 3.36 <sup>a</sup>  | 13.06 | <0.01 | <0.01 |
|                                   |                    |       |       |                    |       |       |                    |       |       |       |
| p__Actinobacteria                 | 5.10               | 1.32  | <0.01 | 4.05               | 0.53  | 0.01  | 2.89               | 1.01  | <0.01 | 0.19  |
| c__Actinobacteria                 | 3.49               | 1.10  | 0.01  | 3.30               | 0.40  | 0.03  | 2.69               | 0.59  | <0.01 | 0.70  |
| o__Micrococcales                  | 0.74               | 0.54  | 0.49  | 1.05               | 0.24  | 0.18  | 0.31               | 0.24  | 0.45  | 0.34  |
| f__Dermabacteraceae               | 0.61               | 0.39  | 0.43  | 0.46               | 0.15  | 0.14  | 0.16               | 0.11  | 0.30  | 0.19  |
| g__Brachybacterium                | 0.61               | 0.39  | 0.43  | 0.46               | 0.15  | 0.14  | 0.16               | 0.11  | 0.30  | 0.19  |
| f__Micrococcaceae                 | 0.12               | 0.12  | 0.96  | 0.12               | 0.07  | 0.36  | 0.06               | 0.09  | 0.26  | 0.27  |
| g__Kocuria                        | 0.11               | 0.12  | 0.82  | 0.08               | 0.07  | 0.86  | 0.05               | 0.08  | 0.27  | 0.19  |
| o__Bifidobacteriales              | 0.95               | 0.13  | <0.01 | 1.61               | 0.06  | <0.01 | 1.48               | 0.07  | <0.01 | 0.82  |

|                         |                   |      |       |                    |      |       |                   |      |       |       |
|-------------------------|-------------------|------|-------|--------------------|------|-------|-------------------|------|-------|-------|
| f__Bifidobacteriaceae   | 0.95              | 0.13 | <0.01 | 1.61               | 0.06 | <0.01 | 1.48              | 0.07 | <0.01 | 0.82  |
| g__Bifidobacterium      | 0.95              | 0.13 | <0.01 | 1.61               | 0.06 | <0.01 | 1.48              | 0.07 | <0.01 | 0.82  |
| c__Coriobacteriia       | 1.46 <sup>a</sup> | 0.11 | 0.02  | 0.51 <sup>b</sup>  | 0.05 | 0.06  | 0.09 <sup>b</sup> | 0.32 | 0.20  | 0.02  |
| o__Propionibacteriales  | 1.29 <sup>a</sup> | 0.11 | 0.02  | 0.50 <sup>ab</sup> | 0.05 | 0.06  | 0.09 <sup>b</sup> | 0.32 | 0.20  | 0.02  |
| f__Propionibacteriaceae | 1.29 <sup>a</sup> | 0.11 | 0.02  | 0.50 <sup>ab</sup> | 0.05 | 0.06  | 0.09 <sup>b</sup> | 0.32 | 0.20  | 0.02  |
| g__Haloactinopolyspora  | 1.20 <sup>a</sup> | 0.10 | 0.03  | 0.49 <sup>ab</sup> | 0.05 | 0.09  | 0.08 <sup>b</sup> | 0.30 | 0.18  | 0.04  |
| c__Acidimicrobiia       | 0.30              | 0.10 | <0.01 | 0.23               | 0.08 | 0.09  | 0.13              | 0.10 | 0.38  | 0.07  |
| o__Acidimicrobiales     | 0.30              | 0.10 | <0.01 | 0.23               | 0.08 | 0.09  | 0.12              | 0.10 | 0.55  | 0.06  |
| f__uncultured           | 0.16              | 0.07 | 0.07  | 0.11               | 0.08 | 0.33  | 0.08              | 0.06 | 0.52  | 0.14  |
| g__uncultured           | 0.16              | 0.07 | 0.07  | 0.11               | 0.08 | 0.33  | 0.08              | 0.06 | 0.52  | 0.14  |
|                         |                   |      |       |                    |      |       |                   |      |       |       |
| p__Chloroflexi          | 1.16 <sup>a</sup> | 0.79 | 0.24  | 1.01 <sup>a</sup>  | 0.35 | 0.10  | 0.49 <sup>b</sup> | 0.64 | 0.12  | <0.01 |
| c__Anaerolineae         | 0.87 <sup>a</sup> | 0.69 | 0.54  | 0.89 <sup>a</sup>  | 0.25 | 0.14  | 0.32 <sup>b</sup> | 0.46 | 0.13  | 0.02  |
| o__Anaerolineales       | 0.51              | 0.63 | 0.67  | 0.58               | 0.23 | 0.44  | 0.28              | 0.41 | 0.11  | 0.23  |
| f__Anaerolineaceae      | 0.51              | 0.63 | 0.67  | 0.58               | 0.23 | 0.44  | 0.28              | 0.41 | 0.11  | 0.23  |
| g__uncultured           | 0.41              | 0.57 | 0.57  | 0.36               | 0.16 | 0.04  | 0.21              | 0.31 | 0.13  | 0.31  |
| c__Gitt-GS-136          | 0.25              | 0.08 | 0.17  | 0.09               | 0.09 | 0.90  | 0.10              | 0.16 | 0.13  | 0.18  |
| o__uncultured           | 0.25              | 0.08 | 0.17  | 0.08               | 0.07 | 0.76  | 0.09              | 0.12 | 0.31  | 0.20  |
|                         |                   |      |       |                    |      |       |                   |      |       |       |
| p__Synergistetes        | 0.29              | 0.44 | 0.35  | 0.16               | 0.22 | 0.60  | 0.52              | 1.89 | 0.08  | 0.49  |
| c__Synergistia          | 0.29              | 0.44 | 0.35  | 0.16               | 0.22 | 0.60  | 0.52              | 1.89 | 0.08  | 0.49  |
| o__Synergistales        | 0.29              | 0.44 | 0.35  | 0.16               | 0.22 | 0.60  | 0.52              | 1.89 | 0.08  | 0.49  |
| f__Synergistaceae       | 0.29              | 0.44 | 0.35  | 0.16               | 0.22 | 0.60  | 0.52              | 1.89 | 0.08  | 0.49  |
| g__Cloacibacillus       | 0.19              | 0.21 | 0.86  | 0.12               | 0.16 | 0.57  | 0.15              | 1.51 | 0.03  | 0.49  |
|                         |                   |      |       |                    |      |       |                   |      |       |       |
| p__Acidobacteria        | 0.55              | 0.30 | 0.41  | 0.47               | 0.10 | 0.26  | 0.09              | 0.09 | 0.93  | 0.31  |
| c__Acidobacteria        | 0.55              | 0.30 | 0.41  | 0.47               | 0.10 | 0.26  | 0.09              | 0.09 | 0.93  | 0.31  |
| o__Subgroup             | 0.55              | 0.30 | 0.41  | 0.47               | 0.10 | 0.26  | 0.09              | 0.09 | 0.93  | 0.31  |
| f__uncultured           | 0.55              | 0.30 | 0.41  | 0.47               | 0.10 | 0.26  | 0.09              | 0.09 | 0.93  | 0.31  |
| g__uncultured           | 0.55              | 0.30 | 0.41  | 0.47               | 0.10 | 0.26  | 0.09              | 0.09 | 0.93  | 0.31  |
|                         |                   |      |       |                    |      |       |                   |      |       |       |
| p__Gemmatimonadetes     | 0.56              | 0.10 | 0.18  | 0.52               | 0.09 | 0.19  | 0.10              | 0.12 | 0.87  | 0.40  |
| c__Gemmatimonadetes     | 0.56              | 0.10 | 0.18  | 0.52               | 0.09 | 0.19  | 0.10              | 0.12 | 0.87  | 0.40  |
| o__Gemmatimonadales     | 0.52              | 0.08 | 0.22  | 0.50               | 0.09 | 0.21  | 0.08              | 0.11 | 0.71  | 0.43  |
| f__Gemmatimonadaceae    | 0.52              | 0.07 | 0.20  | 0.50               | 0.09 | 0.21  | 0.08              | 0.11 | 0.71  | 0.43  |
| g__Gemmatimonas         | 0.52              | 0.07 | 0.20  | 0.50               | 0.09 | 0.21  | 0.08              | 0.11 | 0.71  | 0.43  |
|                         |                   |      |       |                    |      |       |                   |      |       |       |
| p__Cyanobacteria        | 0.17              | 0.06 | 0.41  | 0.23               | 0.07 | 0.15  | 0.06              | 0.18 | 0.16  | 0.43  |
| c__Melainabacteria      | 0.17              | 0.06 | 0.38  | 0.23               | 0.07 | 0.15  | 0.06              | 0.18 | 0.16  | 0.43  |
| o__Gastranaerophilales  | 0.17              | 0.06 | 0.38  | 0.23               | 0.07 | 0.15  | 0.06              | 0.18 | 0.16  | 0.43  |
| f__uncultured           | 0.15              | 0.06 | 0.41  | 0.21               | 0    | 0.05  | 0.06              | 0.18 | 0.16  | 0.45  |

|                                    |      |      |       |      |   |      |      |      |      |      |
|------------------------------------|------|------|-------|------|---|------|------|------|------|------|
| g__uncultured                      | 0.15 | 0.06 | 0.41  | 0.21 | 0 | 0.05 | 0.06 | 0.18 | 0.16 | 0.45 |
|                                    |      |      |       |      |   |      |      |      |      |      |
| p__Tenericutes                     | 0.09 | 0.07 | 0.69  | 0.15 | 0 | 0.24 | 0.15 | 0.21 | 0.50 | 0.62 |
| c__Mollicutes                      | 0.09 | 0.07 | 0.69  | 0.15 | 0 | 0.24 | 0.15 | 0.21 | 0.50 | 0.62 |
| o__Mollicutes RF9                  | 0.08 | 0.06 | 0.68  | 0.14 | 0 | 0.38 | 0.14 | 0.18 | 0.65 | 0.65 |
| f__uncultured                      | 0.08 | 0    | 0.25  | 0.14 | 0 | 0.38 | 0.12 | 0.14 | 0.83 | 0.72 |
|                                    |      |      |       |      |   |      |      |      |      |      |
| p__Nitrospirae                     | 0.32 | 0    | 0.01  | 0.24 | 0 | 0.17 | 0.08 | 0    | 0.34 | 0.34 |
| c__Nitrospira                      | 0.32 | 0    | 0.01  | 0.24 | 0 | 0.17 | 0.08 | 0    | 0.34 | 0.34 |
| o__Nitrospirales                   | 0.32 | 0    | 0.01  | 0.24 | 0 | 0.17 | 0.08 | 0    | 0.34 | 0.34 |
| f__Nitrospirales<br>Incertae Sedis | 0.31 | 0    | <0.01 | 0.19 | 0 | 0.16 | 0.08 | 0    | 0.34 | 0.27 |
| g__Candidatus<br>Methylomirabilis  | 1.35 | 0.20 | 0.11  | 0.19 | 0 | 0.16 | 0.08 | 0    | 0.34 | 0.26 |
| p__Tenericutes                     | 0.09 | 0.07 | 0.56  | 0.15 | 0 | 0.04 | 0.10 | 0.21 | 0.03 | 0.17 |
| c__Mollicutes                      | 0.09 | 0.07 | 0.56  | 0.15 | 0 | 0.04 | 0.10 | 0.21 | 0.03 | 0.17 |
| o__Tenericutes                     | 0.08 | 0.06 | 0.49  | 0.14 | 0 | 0.05 | 0.10 | 0.18 | 0.05 | 0.42 |
| f__uncultured                      | 0.08 | 0    | 0.49  | 0.14 | 0 | 0.05 | 0.10 | 0.14 | 0.05 | 0.42 |
|                                    |      |      |       |      |   |      |      |      |      |      |
| p__Nitrospirae                     | 0.32 | 0    | 0.02  | 0.24 | 0 | 0.01 | 0.07 | 0    | 0.12 | 0.09 |
| c__Nitrospira                      | 0.32 | 0    | 0.02  | 0.24 | 0 | 0.01 | 0.07 | 0    | 0.12 | 0.09 |
| o__Nitrospirales                   | 0.32 | 0    | 0.02  | 0.24 | 0 | 0.01 | 0.07 | 0    | 0.12 | 0.09 |
| f__Nitrospirales<br>Incertae Sedis | 0.30 | 0    | 0.03  | 0.19 | 0 | 0.02 | 0.07 | 0    | 0.12 | 0.10 |
| g__Candidatus<br>Methylomirabilis  | 0.30 | 0    | 0.03  | 0.19 | 0 | 0.02 | 0.07 | 0    | 0.12 | 0.10 |
